# Supplementary material for: LINC00205 promotes malignancy in lung cancer by recruiting FUS and stabilizing CSDE1
Source: PubMed Central journal article supplement (PMC7536328; doi:10.1042/bsr20190701), 2020-10-05
Supplement: BSR-2019-0701_supp.pdf [file BSR-2019-0701_supp.pdf]

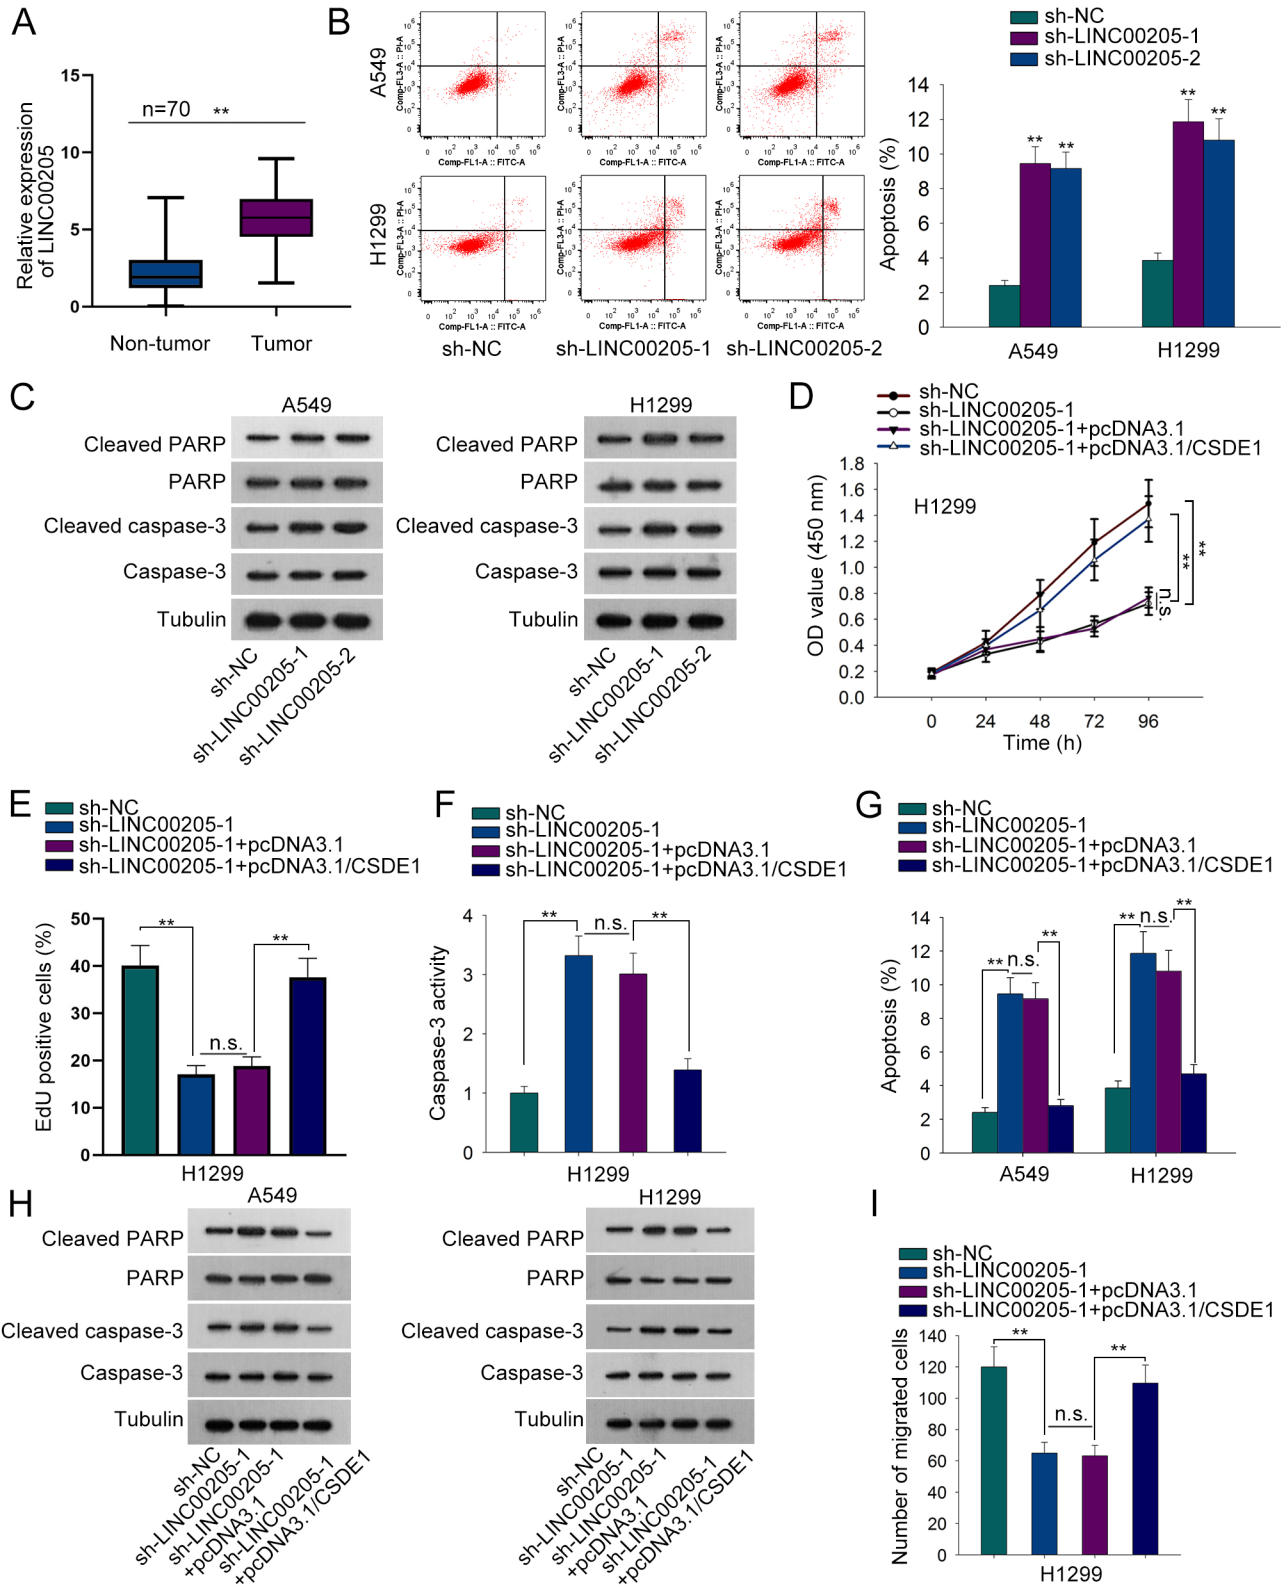

**Supplementary Figure S1.** (A) RT-qPCR tested the expression of LINC00205 in 70 LC tissues and matched non-tumor tissues. (B) The apoptosis of LC cells was determined by flow cytometry analysis. (C) western blot evaluated the levels of proteins related to apoptosis, including cleaved PARP, cleaved caspase-3 and the total PARP and caspase-3, in LC cells with or without LINC00205 silence. (D-I) The viability, proliferation, apoptosis and migration of H1299 cells under indicated contexts was examined through conducting CCK-8 assay, EdU assay, caspase-3 activity detection assay, flow cytometry analysis, western blot analysis and transwell assay. The assays above were all carried out at least three times. \*\*P < 0.01, n.s. meant no significance.
